# Supplementary material for: Optical-electric properties of poly(amic acid) composite films with a low content of thermotropic liquid crystals
Source: Royal Society of Chemistry journal article supplement (doi:10.1039/c6ra10244a), 2016-01-01
Supplement: c6ra10244a1.pdf [file c6ra10244a1.pdf]

# Optical-electric properties of poly(amic acid) composite films with low content of thermotropic liquid crystal

*Ling Ding<sup>a</sup>, Yihe Zhang<sup>a\*</sup>, Leipeng Liu<sup>a</sup>, Jianshe Hu<sup>b\*</sup>, FengZhu Lv<sup>a\*</sup>*

<sup>a</sup>Beijing Key Laboratory of Materials Utilization of Nonmetallic Minerals and Solid Wastes, National Laboratory of Mineral Materials, School of Materials Science and Technology, China University of Geosciences, Beijing, 100083, China

<sup>b</sup>Center for Molecular Science and Engineering, College of Science, Northeastern University, Shenyang 110004, People's Republic of China

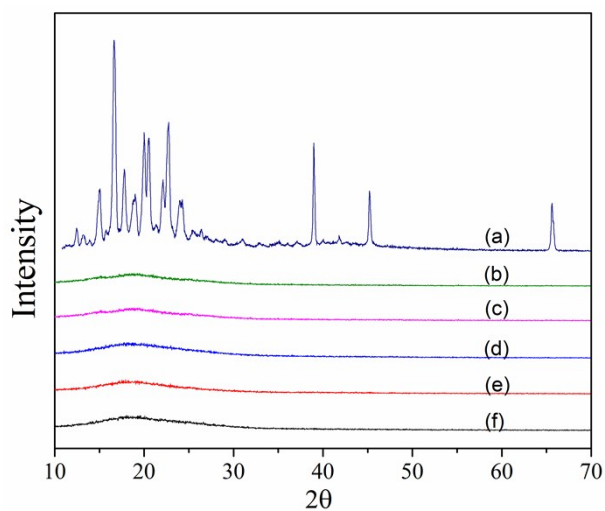

S1 XRD patterns of (a) COOA, (b) 3COOA/PAA-200, (c) 3COOA/PAA-145, (d) 3COOA/PAA-120, (e) 3COOA/PAA-60 and (f) PAA-120.

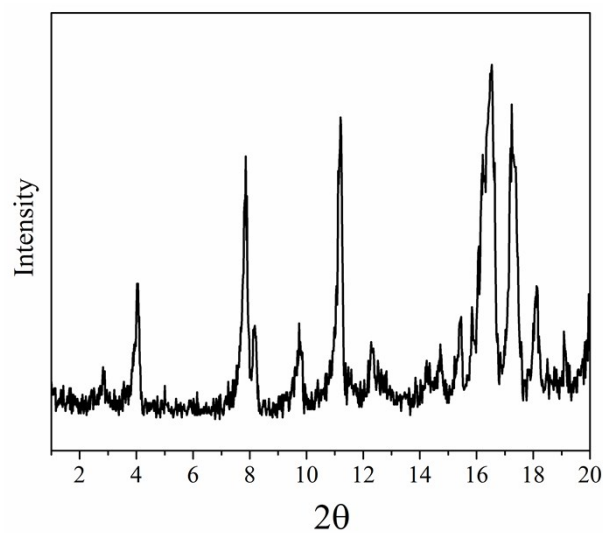

S2 XRD pattern of COOA

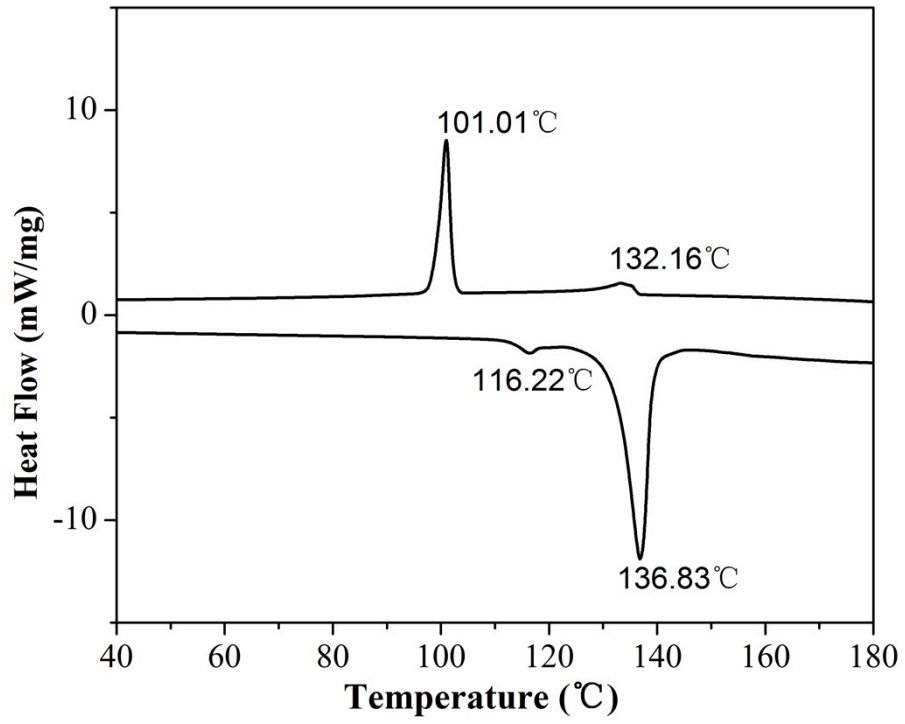

S3 DSC curves of COOA.
